# Supplementary material for: Streptomyces sp. AN090126 as a Biocontrol Agent against Bacterial and Fungal Plant Diseases
Source: Microorganisms. 2022 Apr 8;10(4):791. doi: 10.3390/microorganisms10040791 (PMC9025191; doi:10.3390/microorganisms10040791)

## Supplementary Materials

### Materials and Methods

#### *In vivo* assay

##### *Plant material*

Tomato ('Seokwnag'; Farm Hannong Co., Ltd, Seoul, South Korea), Kimchi cabbage ('Chunkwang'; Sakada Korea, Seoul, South Korea), and red pepper ('Josaengsintopgochu'; Nongwoobio Co., Ltd., Suwon, South Korea) were sown in vinyl pots (diameter, 6.0 cm) containing nursery soil and maintained in an incubation room with 12 h of daylight per day. The plants were transplanted into plastic pots (diameter, 7.5 cm) 24 h before treatment. Creeping bentgrass was grown in a plastic pot (diameter, 7.5 cm) at 25 °C for 4 weeks, and the potted seedlings were cut at a height of 2 cm from the mouth of the pots 1 day before inoculation.

##### *Tomato bacterial wilt*

To tomato plants at the four-leaf stage, the fermentation broth of *Streptomyces* sp. AN090126 was applied using soil drenching. The plant was treated with 20 ml each of the fermentation broth per pot at 24 h before inoculation, and then 20 ml of Rs cell suspension ( $10^8$  CFU/ml, 10 mM MgCl<sub>2</sub>) was inoculated by soil drenching. The inoculated plants were incubated in the dark for 24 h and then transferred to an incubation room at 30 °C with 75% relative humidity (RH) and 12 h of daylight per day for 10 days. The disease severity was graded on the following scale: 0 = no leaf symptoms; 1 = one leaf wilted; 2 = two or three leaves wilted; 3 = more than four leaves wilted; and 4 = plant death.

##### *Red pepper bacterial leaf spot*

The disease control efficacy of the fermentation broth of AN090126 against red pepper leaf spot disease was tested in red pepper plants at the six-leaf stage. Briefly, 5 ml aliquots of each sample were applied to the plants by foliar spray, and then the treated plants were inoculated with 5 ml of Xe cell suspension ( $10^7$  CFU/ml) using the same method 24 h after the treatment. The inoculated plants were incubated at 25 °C with 100% RH and 12 h of daylight per day for 16 days. The disease index was recorded using the following scale: 0 = no symptoms; 1 = symptomless; 2 = a few necrotic spots on a few leaflets; 3 = a few necrotic spots on many leaflets; 4 = many spots with coalescence on a few leaflets; 5 = many spots with coalescence on many leaflets; 6 = severe disease and leaf defoliation; and 7 = plant death.

#### *Creeping bentgrass dollar spot disease*

Therefore, the biocontrol efficacy of the fermentation broth was evaluated against dollar spot in creeping bentgrass caused by Sh. Briefly, 4-week-old plants were treated with 20 ml of each sample by soil drenching, and then inoculated with 8 ml of the fungal mycelial suspension (1%) using the same method 24 h after the treatment. The inoculated plants were incubated in a growth chamber at 25 °C with 100% RH and 12 h of daylight per day for 7 days. The disease severity was calculated as the percentage of diseased shoot area.

#### *Kimchi cabbage bacterial soft rot*

Briefly, 5-week-old plants were treated with 20 ml of each sample per plant via soil drenching. After 24 h, the treated plants were inoculated with 20 ml of Sr-Pcc suspension ( $10^7$  CFU/ml, 10 mM MgCl<sub>2</sub>) using the same method. The plants were incubated in the dark at 30 °C with 100% RH for 48 h and then transferred to an incubation room at 30 °C with 12 h of daylight per day for 8 days. The disease severity was assessed using the following scale:

0 = no symptoms; 1 = one or two pencil-line streaks; 2 = more than two pencil-line streaks; 3 = leaf chlorosis or bleaching; 4 = leaf necrosis; and 5 = plant death.

#### *Calculation of the control value*

The *in vivo* experiment was repeated two times with three replicates per treatment, and the values were converted to a control percentage ( $\pm$  standard deviation) compared to negative controls using the following equation:

For bacterial disease assays,

$$\text{Control value (\%)} = [(\text{DS of untreated plant} - \text{DS of treated plant}) \div \text{DS of untreated plant}] \times 100\% \quad (1)$$

where DS = disease severity

For fungal disease assay

$$\text{Control value (\%)} = [(A - B) \div A] \times 100\% \quad (2)$$

where A is the infected shoot area (%) in the untreated controls and B is the infected shoot area (%) in the treated plants.

**Table S1.** Morphological characterization and physicochemical properties of *Streptomyces* sp. AN090126.

| <b>Morphological characterization</b> |                   |
|---------------------------------------|-------------------|
| Color of the substrate mycelium       | Greenish gray     |
| Color of the aerial mycelium          | Greenish beige    |
| Spore chain arrangement               | Long and fragment |
| Spore surface                         | Rough             |
| Pigment production                    | Beige brown       |
| <b>Enzymatic activity</b>             |                   |
| Amylase                               | -                 |
| Cellulase                             | +                 |
| Lipase                                | +                 |
| Protease                              | +                 |
| <b>Physiological properties</b>       |                   |
| 0% NaCl                               | ++                |
| 1% NaCl                               | ++                |
| 3% NaCl                               | ++                |
| 7% NaCl                               | +                 |
| 10 °C                                 | -                 |
| 28 °C                                 | +++               |

|         |     |
|---------|-----|
| 45 °C   | +++ |
| pH 4.0  | +++ |
| pH 7.0  | +++ |
| pH 10.0 | ++  |

---

+++ , very good; ++, good; + weak; - unresponsiveness

**Table S2.** Organic acids produced by *Streptomyces* sp. AN090126.

| Peak name     | Retention time, min | Peak area, %              |
|---------------|---------------------|---------------------------|
| Oxalic acid   | 5.940               | 32.16 ± 0.14 <sup>a</sup> |
| Citric acid   | 6.552               | 6.64 ± 0.12 <sup>d</sup>  |
| Unknown       | 6.854               | 6.60 ± 0.10 <sup>d</sup>  |
| Unknown       | 7.247               | 5.83 ± 0.06 <sup>e</sup>  |
| Tartaric acid | 7.839               | 7.10 ± 0.10 <sup>c</sup>  |
| Malic acid    | 8.215               | 4.57 ± 0.10 <sup>g</sup>  |
| Unknown       | 8.961               | 5.63 ± 0.06 <sup>f</sup>  |
| Malonic acid  | 9.472               | 14.14 ± 0.05 <sup>b</sup> |
| Unknown       | 10.207              | 7.05 ± 0.13 <sup>c</sup>  |
| Succinic acid | 11.001              | 5.55 ± 0.22 <sup>f</sup>  |
| Lactic acid   | 12.060              | 1.93 ± 0.03 <sup>h</sup>  |
| Unknown       | 12.747              | 1.32 ± 0.03 <sup>i</sup>  |
| Fumaric acid  | 13.433              | 0.21 ± 0.02 <sup>m</sup>  |
| Acetic acid   | 14.940              | 0.42 ± 0.03 <sup>k</sup>  |
| Unknown       | 15.700              | 0.85 ± 0.05 <sup>j</sup>  |

Means within the same column followed by the different letter are significantly different ( $p < 0.05$ ) according to Duncan's multiple range test.

**Figure S1.** Heatmap generated with OrthoANI values calculated from the OAT software among *Streptomyces* sp. AN090126 with other type strain of *Streptomyces* species

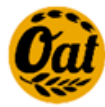

Heatmap generated with OrthoANI values calculated from the OAT software. Please cite Lee et al. 2015.

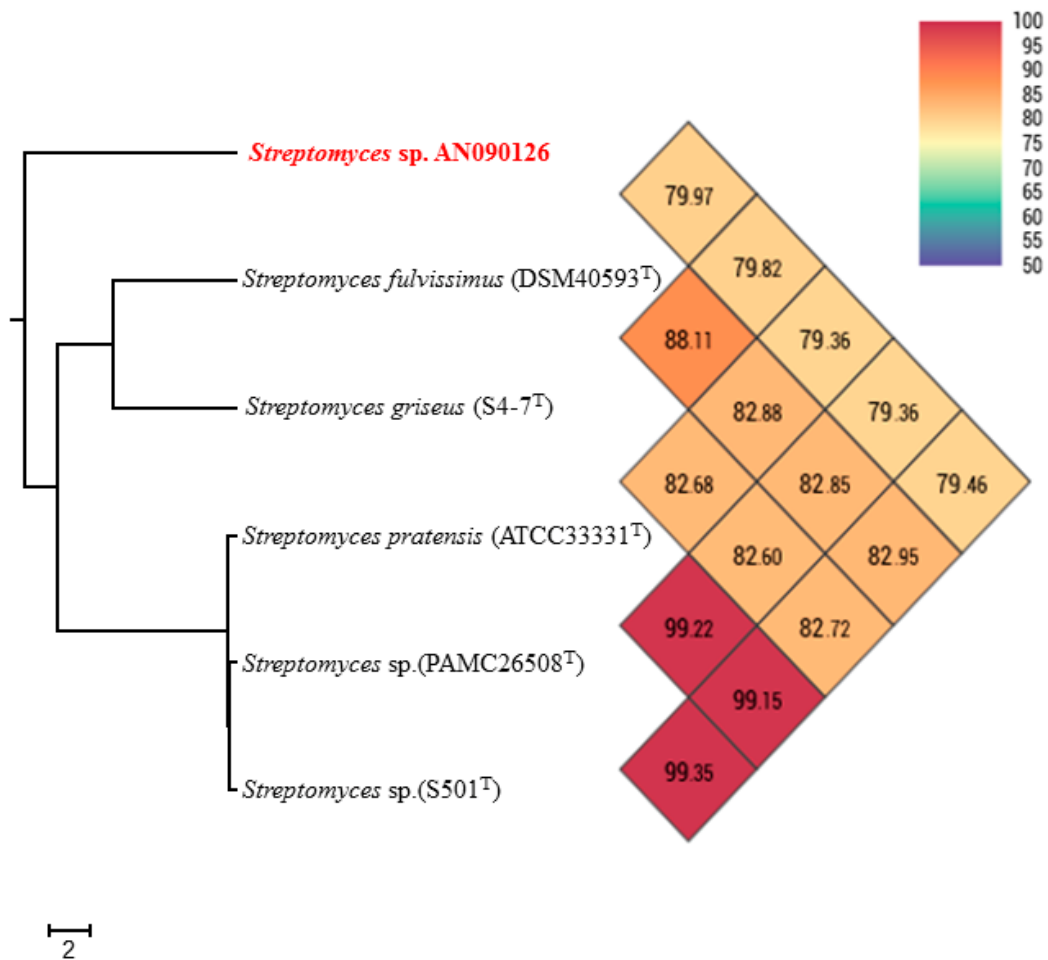

**Figure S2.** Results of total ion chromatography and gas chromatography–mass spectrometry showing differences in peaks between *Streptomyces* sp. AN090126 and control (ISP2 medium) (A). Microscopic observation of *Fusarium graminearum* hyphae after 4 days of exposure to volatile organic compounds produced by *Streptomyces* sp. AN090126 (B).

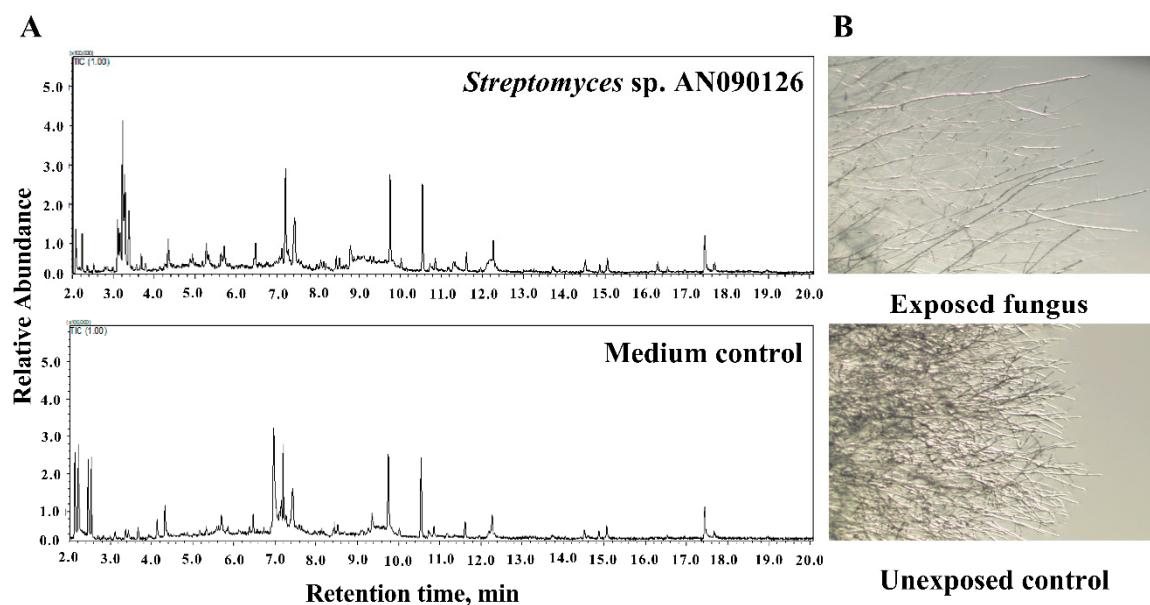

**Figure S3.** Effect of temperature on the antimicrobial activity of active substances (A). Bioautography of active substances on paper thin-layer chromatography using a butanol:acetic acid:water (4:1:5) solvent system (B). BA = antibacterial activity; FA = antifungal activity; *Acidovorax avenae* subsp. *cattleyae* and *Fusarium graminearum* were used as the indicators.

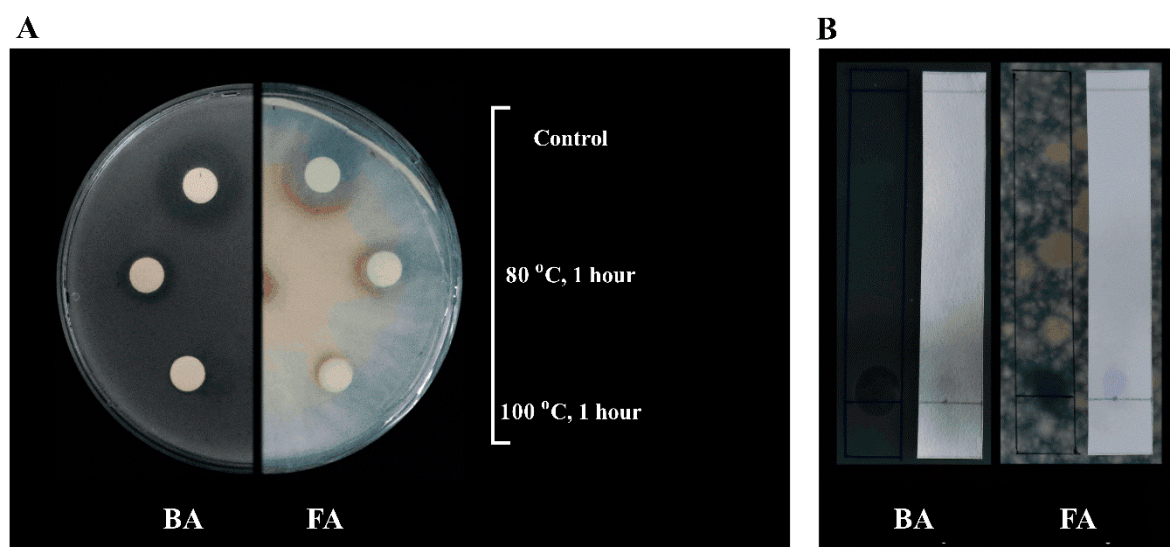

Supplement: Supplementary file 1 [file microorganisms-10-00791-s001.zip › microorganisms-1664522-supplementary.pdf]
